# Supplementary material for: Pimavanserin and Parkinson’s Disease Psychosis: A Narrative Review
Source: MDPI journal article supplement (doi:10.3390/brainsci12101286), 2022-09-23
Supplement: s1 [file s1]

# **Pimavanserin And Parkinson's Disease Psychosis: A Narrative Review**

## **SUPPLEMENTARY MATERIAL**

Supplementary material S1 – Methodology

Supplementary materials S2 – Pharmacological

properties Supplementary material S3 – Pimavanserin

clinical trials Supplementary material S4 – 5-HT<sub>2A</sub> and

Diseases Supplementary Material S5 – Scale

## Supplementary material S1 – Methodology

### METHODS

#### Search Strategy

We searched six databases to locate the studies on pimavanserin published from 2006 to June 2022 in electronic form. Excerpta Medica (Embase), Google Scholar, Latin American & Caribbean Health Sciences Literature (Lilacs), Medline, Scientific Electronic Library Online (Scielo), and Science Direct were searched. Search terms were “pimavanserin, parkinson, psychosis” Publications in English and Spanish were included in the search.

|                                      |                                                                                                                                                                                                                                                                                                                                                                                                                                                                                                                                  |     |
|--------------------------------------|----------------------------------------------------------------------------------------------------------------------------------------------------------------------------------------------------------------------------------------------------------------------------------------------------------------------------------------------------------------------------------------------------------------------------------------------------------------------------------------------------------------------------------|-----|
| Pimavanserin                         | "pimavanserin"[Supplementary Concept] OR "pimavanserin"[All Fields]                                                                                                                                                                                                                                                                                                                                                                                                                                                              | 231 |
| (pimavanserin)<br>AND<br>(parkinson) | ("pimavanserin"[Supplementary Concept] OR "pimavanserin"[All Fields]) AND ("parkinson disease"[MeSH Terms] OR ("parkinson"[All Fields] AND "disease"[All Fields]) OR "parkinson disease"[All Fields] OR "parkinsons"[All Fields] OR "parkinson"[All Fields] OR "parkinson s"[All Fields] OR "parkinsonian disorders"[MeSH Terms] OR ("parkinsonian"[All Fields] AND "disorders"[All Fields]) OR "parkinsonian disorders"[All Fields] OR "parkinsonism"[All Fields] OR "parkinsonisms"[All Fields] OR "parkinsons s"[All Fields]) | 174 |
| (pimavanserin)<br>AND<br>(psychosis) | ("pimavanserin"[Supplementary Concept] OR "pimavanserin"[All Fields]) AND ("psychotic disorders"[MeSH Terms] OR ("psychotic"[All Fields] AND "disorders"[All Fields]) OR "psychotic disorders"[All Fields] OR "psychosis"[All Fields])                                                                                                                                                                                                                                                                                           | 177 |

Figure – Number of publications on Pubmed/Medline throughout the years related to pimavanserin

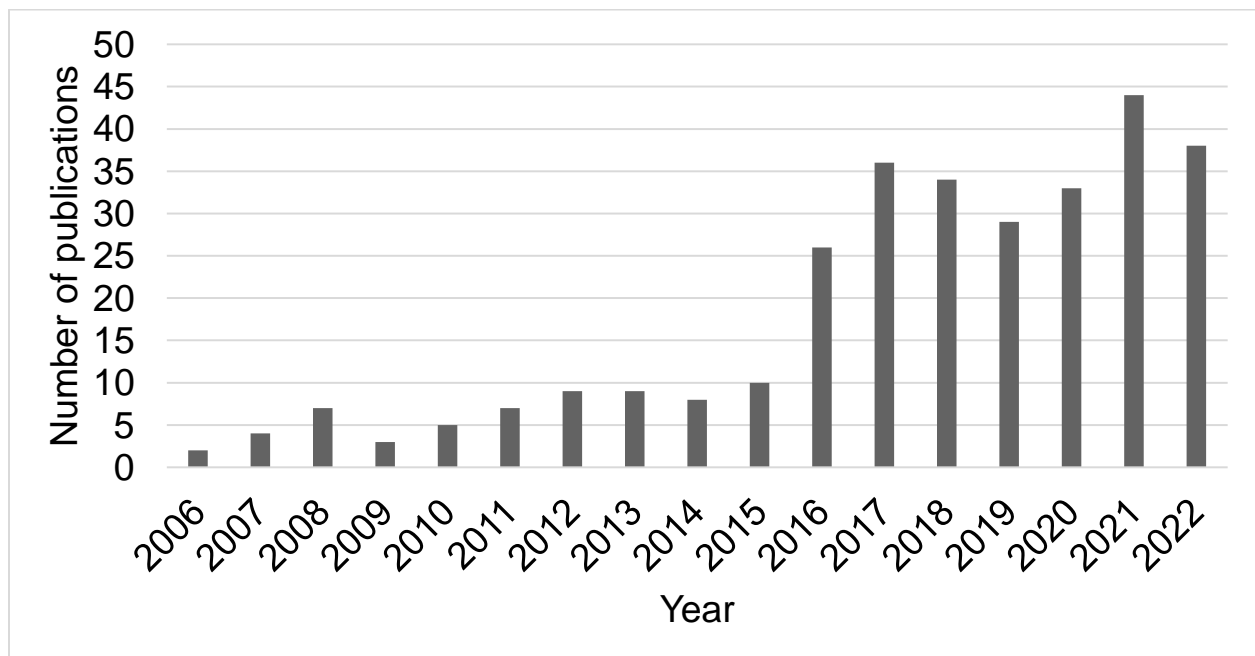

## Supplementary materials S2 – Pharmacological properties

| Supplementary materials 2 – Pharmacological and physicochemical properties of pimavanserin                                                                                                                                                                                                                                                                                                                                             |                                                                                                                      |       |       |       |    |    |    |    |    |    |    |    |    |     |     |  |
|----------------------------------------------------------------------------------------------------------------------------------------------------------------------------------------------------------------------------------------------------------------------------------------------------------------------------------------------------------------------------------------------------------------------------------------|----------------------------------------------------------------------------------------------------------------------|-------|-------|-------|----|----|----|----|----|----|----|----|----|-----|-----|--|
| Skeletal formula                                                                                                                                                                                                                                                                                                                                                                                                                       | 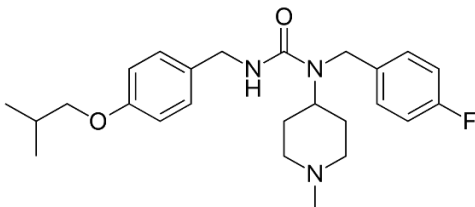                                   |       |       |       |    |    |    |    |    |    |    |    |    |     |     |  |
| SMILES                                                                                                                                                                                                                                                                                                                                                                                                                                 | CC(C)COC1=CC=C(C=C1)CNC(=O)N(CC2=CC=C(C=C2)F)C3CCN(CC3)C                                                             |       |       |       |    |    |    |    |    |    |    |    |    |     |     |  |
| Other names                                                                                                                                                                                                                                                                                                                                                                                                                            | ACP-103; BVF-048                                                                                                     |       |       |       |    |    |    |    |    |    |    |    |    |     |     |  |
| Trade Name                                                                                                                                                                                                                                                                                                                                                                                                                             | Nuplazid, Acadia Pharmaceuticals Inc                                                                                 |       |       |       |    |    |    |    |    |    |    |    |    |     |     |  |
| US FDA Approval                                                                                                                                                                                                                                                                                                                                                                                                                        | April 29, 2016                                                                                                       |       |       |       |    |    |    |    |    |    |    |    |    |     |     |  |
| Indication                                                                                                                                                                                                                                                                                                                                                                                                                             | Treatment of hallucinations and delusions associated with Parkinson's disease psychosis                              |       |       |       |    |    |    |    |    |    |    |    |    |     |     |  |
| Dosage forms                                                                                                                                                                                                                                                                                                                                                                                                                           | Capsule 34mg; Tablet 10mg                                                                                            |       |       |       |    |    |    |    |    |    |    |    |    |     |     |  |
| Dosage adjustment                                                                                                                                                                                                                                                                                                                                                                                                                      | No need for dosage adjustment with renal or hepatic impairment. But cautiously use is advised.                       |       |       |       |    |    |    |    |    |    |    |    |    |     |     |  |
| Most common adverse effects (>1%)                                                                                                                                                                                                                                                                                                                                                                                                      | Nausea, peripheral edema, confusional state, hallucinations, constipation, and gait disturbance                      |       |       |       |    |    |    |    |    |    |    |    |    |     |     |  |
| Black box warning                                                                                                                                                                                                                                                                                                                                                                                                                      | Elderly patients with dementia-related psychosis treated with antipsychotic drugs are at an increased risk of death. |       |       |       |    |    |    |    |    |    |    |    |    |     |     |  |
| Mechanism of action                                                                                                                                                                                                                                                                                                                                                                                                                    | Selective serotonin inverse agonist/antagonist activity preferentially targeting 5HT2Ar                              |       |       |       |    |    |    |    |    |    |    |    |    |     |     |  |
| Peak plasma                                                                                                                                                                                                                                                                                                                                                                                                                            | 6 hours                                                                                                              |       |       |       |    |    |    |    |    |    |    |    |    |     |     |  |
| Protein-bound                                                                                                                                                                                                                                                                                                                                                                                                                          | >95%                                                                                                                 |       |       |       |    |    |    |    |    |    |    |    |    |     |     |  |
| Volume distribution                                                                                                                                                                                                                                                                                                                                                                                                                    | 2173L                                                                                                                |       |       |       |    |    |    |    |    |    |    |    |    |     |     |  |
| Metabolism                                                                                                                                                                                                                                                                                                                                                                                                                             | Predominantly, CYP3A4 and CYP3A5. Others: CYP2J2, CYP2D6.                                                            |       |       |       |    |    |    |    |    |    |    |    |    |     |     |  |
| Half-life                                                                                                                                                                                                                                                                                                                                                                                                                              | 57 hours (pimavanserin), 200 hours (active metabolite)                                                               |       |       |       |    |    |    |    |    |    |    |    |    |     |     |  |
| Excretion                                                                                                                                                                                                                                                                                                                                                                                                                              | 55% unchanged in the urine                                                                                           |       |       |       |    |    |    |    |    |    |    |    |    |     |     |  |
| Formula                                                                                                                                                                                                                                                                                                                                                                                                                                | C25H34FN3O2                                                                                                          |       |       |       |    |    |    |    |    |    |    |    |    |     |     |  |
| Molecular weight (150–500 g/mol)                                                                                                                                                                                                                                                                                                                                                                                                       | 427.55 g/mol                                                                                                         |       |       |       |    |    |    |    |    |    |    |    |    |     |     |  |
| Fraction Csp3 (0.25–1.0)                                                                                                                                                                                                                                                                                                                                                                                                               | 0.48                                                                                                                 |       |       |       |    |    |    |    |    |    |    |    |    |     |     |  |
| Num. rotatable bonds (0-9)                                                                                                                                                                                                                                                                                                                                                                                                             | 10                                                                                                                   |       |       |       |    |    |    |    |    |    |    |    |    |     |     |  |
| Num. H-bond acceptors                                                                                                                                                                                                                                                                                                                                                                                                                  | 4                                                                                                                    |       |       |       |    |    |    |    |    |    |    |    |    |     |     |  |
| Num. H-bond donors (≤5)                                                                                                                                                                                                                                                                                                                                                                                                                | 1                                                                                                                    |       |       |       |    |    |    |    |    |    |    |    |    |     |     |  |
| Topological polar surface area (20-130 Å²)                                                                                                                                                                                                                                                                                                                                                                                             | 44.81 Å²                                                                                                             |       |       |       |    |    |    |    |    |    |    |    |    |     |     |  |
| Consensus Log Po/w (0.7–5.0)                                                                                                                                                                                                                                                                                                                                                                                                           | 4.29                                                                                                                 |       |       |       |    |    |    |    |    |    |    |    |    |     |     |  |
| Log S (ESOL) (- 6–0)                                                                                                                                                                                                                                                                                                                                                                                                                   | -4.97                                                                                                                |       |       |       |    |    |    |    |    |    |    |    |    |     |     |  |
| Class                                                                                                                                                                                                                                                                                                                                                                                                                                  | Moderately soluble                                                                                                   |       |       |       |    |    |    |    |    |    |    |    |    |     |     |  |
| Gastrointestinal absorption                                                                                                                                                                                                                                                                                                                                                                                                            | High                                                                                                                 |       |       |       |    |    |    |    |    |    |    |    |    |     |     |  |
| Blood-brain-barrier permeant                                                                                                                                                                                                                                                                                                                                                                                                           | Yes                                                                                                                  |       |       |       |    |    |    |    |    |    |    |    |    |     |     |  |
| Bioavailability score                                                                                                                                                                                                                                                                                                                                                                                                                  | 0.55                                                                                                                 |       |       |       |    |    |    |    |    |    |    |    |    |     |     |  |
| Synthetic accessibility [1(very easy) – 10 (very difficult)]                                                                                                                                                                                                                                                                                                                                                                           | 3.02                                                                                                                 |       |       |       |    |    |    |    |    |    |    |    |    |     |     |  |
| Receptor selectivity of pimavanserin (Ki nM)                                                                                                                                                                                                                                                                                                                                                                                           | 5HT2A                                                                                                                | 5HT2B | 5HT2C | 5HT1A | H1 | M1 | M2 | M3 | M4 | M5 | D1 | D2 | D3 | α1A | α2A |  |
|                                                                                                                                                                                                                                                                                                                                                                                                                                        | 0.4                                                                                                                  | -     | 16    | -     | -  | 1  | -  | -  | 4  | -  | -  | -  | -  | -   | -   |  |
| Physiochemical parameters computed with SwissADME. Daina A, Michielin O, Zoete V. SwissADME: a free web tool to evaluate pharmacokinetics, drug-likeness and medicinal chemistry friendliness of small molecules. Sci Rep 2017;7:42717. Hacksell U, Burstein ES, McFarland K, Mills RG, Williams H. On the discovery and development of pimavanserin: a novel drug candidate for Parkinson's psychosis. Neurochem Res 2014;39:2008-17. |                                                                                                                      |       |       |       |    |    |    |    |    |    |    |    |    |     |     |  |

### Supplementary material S3 – Pimavanserin clinical trials

| Summary of clinical trials related to pimavanserin |                                             |               |     |                                                                                                                                                                                                                                                                   |
|----------------------------------------------------|---------------------------------------------|---------------|-----|-------------------------------------------------------------------------------------------------------------------------------------------------------------------------------------------------------------------------------------------------------------------|
| Completion                                         | Condition (or injury that is being studied) | CT identifier | n   | Summary                                                                                                                                                                                                                                                           |
| -                                                  | PD psychosis                                | NCT02762591   | -   | Provide patients with PD psychosis access to pimavanserin until the product receives marketing approval from the FDA and is commercially available.                                                                                                               |
| March 2007                                         | Schizophrenia                               | NCT00361166   | 400 | Efficacy, safety, and tolerability of the combination of pimavanserin with either haloperidol or risperidone.                                                                                                                                                     |
| November 2007                                      | Levodopa-induced dyskinesias                | NCT00086294   | 40  | Efficacy of pimavanserin on PD symptoms and levodopa-induced dyskinesia.                                                                                                                                                                                          |
| July 2009                                          | PD psychosis                                | NCT00477672   | 298 | Safety and efficacy of pimavanserin in patients with PD psychosis.                                                                                                                                                                                                |
| December 2009                                      | PD psychosis                                | NCT00658567   | 123 | Safety and efficacy of pimavanserin in patients with PD psychosis.                                                                                                                                                                                                |
| November 2012                                      | PD psychosis                                | NCT01174004   | 199 | Safety and efficacy of pimavanserin in patients with PD psychosis.                                                                                                                                                                                                |
| May 2013                                           | PD psychosis                                | NCT01518309   | 39  | Long-term safety and tolerability in subjects with PD psychosis.                                                                                                                                                                                                  |
| October 2016                                       | Alzheimer's disease psychosis               | NCT02035553   | 181 | Safety and efficacy of pimavanserin in patients with Alzheimer's disease psychosis.                                                                                                                                                                               |
| February 2018                                      | Alzheimer's disease behavioral symptoms     | NCT02992132   | 111 | Safety and tolerability of pimavanserin in subjects with probable Alzheimer's disease who have symptoms of agitation and aggression.                                                                                                                              |
| May 2018                                           | PD psychosis                                | NCT00550238   | 459 | Long-term safety and tolerability of pimavanserin in subjects with PD psychosis.                                                                                                                                                                                  |
| October 2018                                       | Major depressive disorder                   | NCT03018340   | 207 | Efficacy of pimavanserin when given adjunctively to a selective serotonin reuptake inhibitor/serotonin-norepinephrine reuptake inhibitor antidepressant as treatment of patients with major depressive disorder an inadequate response to antidepressant therapy. |
| February 2019                                      | Alzheimer's disease behavioral symptoms     | NCT03118947   | 79  | Safety and tolerability of pimavanserin in subjects with probable Alzheimer's disease who have symptoms of agitation and aggression.                                                                                                                              |
| June 2019                                          | Schizophrenia                               | NCT02970292   | 396 | Efficacy and safety of adjunctive pimavanserin in the treatment of schizophrenia.                                                                                                                                                                                 |
| July 2019                                          | PD depression                               | NCT03482882   | 47  | Efficacy of pimavanserin for the treatment of depression in adults with PD.                                                                                                                                                                                       |
| October 2019                                       | Dementia-related psychosis                  | NCT03325556   | 392 | Efficacy of pimavanserin in preventing relapse of psychotic symptoms in subjects with dementia-related psychosis.                                                                                                                                                 |
| October 2019                                       | Schizophrenia                               | NCT02970305   | 403 | Efficacy and safety of adjunctive pimavanserin in the treatment of the negative symptoms of schizophrenia.                                                                                                                                                        |
| May 2020                                           | Major depressive disorder                   | NCT03968159   | 298 | To evaluate the efficacy and safety of adjunctive pimavanserin in subjects with a major depressive disorder who have an inadequate response to antidepressant therapy.                                                                                            |
| September 2020                                     | PD                                          | NCT04164758   | 11  | Effects of pimavanserin and low-dose quetiapine in subjects with PD with neuropsychiatric symptoms.                                                                                                                                                               |
| February 2021                                      | Tourette syndrome                           | NCT04794413   | 10  | Efficacy of pimavanserin in Tourette syndrome. Also, the authors aimed to investigate the risk of tardive dyskinesia associated with pimavanserin.                                                                                                                |
| February 2021                                      | Major depressive disorder                   | NCT04000009   | 235 | Safety and tolerability of long-term pimavanserin treatment in subjects with major depressive disorder and inadequate response to antidepressant therapy.                                                                                                         |

|               |                           |             |     |                                                                                                                                                                                                                                                                                                                                             |
|---------------|---------------------------|-------------|-----|---------------------------------------------------------------------------------------------------------------------------------------------------------------------------------------------------------------------------------------------------------------------------------------------------------------------------------------------|
| November 2021 | Insomnia                  | NCT04188392 | 6   | Efficacy of pimavanserin on sleep quality in veterans with post-traumatic stress disorder and insomnia.                                                                                                                                                                                                                                     |
| May 2022      | PD psychosis              | NCT04292223 | 53  | Efficacy of pimavanserin in PD psychosis.                                                                                                                                                                                                                                                                                                   |
| May 2022      | Neuropsychiatric symptoms | NCT03575052 | 784 | Safety and tolerability of pimavanserin in adult and elderly subjects with neuropsychiatric symptoms related to neurodegenerative disease.                                                                                                                                                                                                  |
| March 2023    | Schizophrenia             | NCT04531982 | 426 | Efficacy and safety of adjunctive pimavanserin in managing negative symptoms of schizophrenia.                                                                                                                                                                                                                                              |
| July 2023     | Impulsivity in PD         | NCT03947216 | 130 | Efficacy of pimavanserin for the treatment of impulsive control disorder in PD.                                                                                                                                                                                                                                                             |
| August 2023   | Neuropsychiatric symptoms | NCT03623321 | 597 | Long-term safety and tolerability of pimavanserin in adult and elderly subjects with neuropsychiatric symptoms related to neurodegenerative disease.                                                                                                                                                                                        |
| December 2023 | Insomnia                  | NCT04809116 | 20  | Efficacy of pimavanserin on sleep quality in veterans with post-traumatic stress disorder and insomnia.                                                                                                                                                                                                                                     |
| March 2024    | Schizophrenia             | NCT03121586 | 500 | Long-term safety and tolerability of pimavanserin for adjunctive treatment in subjects with schizophrenia.                                                                                                                                                                                                                                  |
| January 2025  | Schizophrenia             | NCT03994965 | -   | Translational proposal to test the clinical validity of the serotonin hypothesis of schizophrenia and to guide the development of operational, objective criteria for stratification of first-episode schizophrenia spectrum patients before antipsychotic treatment. More than 40 antipsychotics, including pimavanserin, will be studied. |
| August 2026   | PD psychosis              | NCT04373317 | 358 | Safety and effectiveness of quetiapine and pimavanserin in PD psychosis.                                                                                                                                                                                                                                                                    |
| May 2027      | Insomnia                  | NCT05441280 | 60  | Efficacy of pimavanserin on sleep quality in veterans with post-traumatic stress disorder and insomnia.                                                                                                                                                                                                                                     |

Data extracted from <https://clinicaltrials.gov/>. Search term: pimavanserin. Date: August 11<sup>th</sup>, 2022.

Completion: estimated study completion date; n: estimated enrollment (number of participants); PD: Parkinson's disease.

## Supplementary material S4 – 5-HT<sub>2A</sub> and Diseases

| Supplementary Material – 5-HT <sub>2A</sub> receptors and conditions related to the clinical trials of pimavanserin |                                                                                                                                                                                                                                                                                                                                                                |                                                                                                                                                                                                                                                                                                                      |                                                                                        |
|---------------------------------------------------------------------------------------------------------------------|----------------------------------------------------------------------------------------------------------------------------------------------------------------------------------------------------------------------------------------------------------------------------------------------------------------------------------------------------------------|----------------------------------------------------------------------------------------------------------------------------------------------------------------------------------------------------------------------------------------------------------------------------------------------------------------------|----------------------------------------------------------------------------------------|
| Condition                                                                                                           | Mechanism                                                                                                                                                                                                                                                                                                                                                      | Reference                                                                                                                                                                                                                                                                                                            | Clinical trials of pimavanserin                                                        |
| Impulsivity (IMP)                                                                                                   | 5-HT <sub>2A</sub> receptor antagonism decreases premature responding, which can lead to reduced impulsivity. Also, 5-HT <sub>2A</sub> receptor antagonism may unmask inhibitory effects of 5-HT at other 5-HT receptors.                                                                                                                                      | Winstanley CA, Theobald DE, Dalley JW, Glennon JC, Robbins TW. 5-HT <sub>2A</sub> and 5-HT <sub>2C</sub> receptor antagonists have opposing effects on a measure of impulsivity: interactions with global 5-HT depletion. <i>Psychopharmacology</i> 2004;176:376-85.                                                 | NCT03947216                                                                            |
| Insomnia (INS)                                                                                                      | 5-HT <sub>2A</sub> receptor antagonism enhances slow-wave sleep and delta power during non-rapid eye movement and decreases the number of awakenings without significant effect on rapid eye movement sleep.                                                                                                                                                   | Morairty SR, Hedley L, Flores J, Martin R, Kilduff TS. Selective 5HT <sub>2A</sub> and 5HT <sub>6</sub> receptor antagonists promote sleep in rats. <i>Sleep</i> 2008;31:34-44.                                                                                                                                      | NCT04188392<br>NCT04809116<br>NCT05441280                                              |
| Depressive disorder (DD)                                                                                            | Decreased hippocampal 5-HT <sub>2A</sub> receptors result from depressive episodes. Decreased 5-HT <sub>2A</sub> receptors may not necessarily represent a detrimental change but could be part of a compensatory mechanism.                                                                                                                                   | Mintun MA, Sheline YI, Moerlein SM, Vlassenko AG, Huang Y, Snyder AZ. Decreased hippocampal 5-HT <sub>2A</sub> receptor binding in major depressive disorder: in vivo measurement with [18F]altanserin positron emission tomography. <i>Biol Psychiatry</i> 2004;55:217-24.                                          | NCT03018340<br>NCT03482882<br>NCT03968159<br>NCT04000009                               |
| Dyskinesia (DKN)                                                                                                    | Post-mortem evidence of altered 5-HT <sub>2A</sub> receptor levels in levodopa-induced dyskinesia. 5-HT <sub>2A</sub> receptor agonism reduces dyskinesia in animal models. Selective 5-HT <sub>2A</sub> receptor blocking reduces dyskinesias over a specific limit. At high-doses 5-HT blockers could lead to a slight reduction in the effect of levodopa.  | Kwan C, Frouni I, Bédard D, Nuara SG, Gourdon JC, Hamadjida A, et al. 5-HT <sub>2A</sub> blockade for dyskinesia and psychosis in Parkinson's disease: is there a limit to the efficacy of this approach? A study in the MPTP-lesioned marmoset and a literature mini-review. <i>Exp Brain Res</i> 2019;237:435-442. | NCT00086294                                                                            |
| Schizophrenia (SCZ)                                                                                                 | It was observed that patients with schizophrenia compared to healthy subjects have an abnormal binding potential for 5-HT <sub>2A</sub> receptors. These serotonin receptors control dopamine release in the nigrostriatal pathway.                                                                                                                            | Abdolmaleky HM, Faraone SV, Glatt SJ, Tsuang MT. Meta-analysis of association between the T102C polymorphism of the 5HT <sub>2a</sub> receptor gene and schizophrenia. <i>Schizophr Res</i> 2004;67:53-62.                                                                                                           | NCT00361166<br>NCT02970292<br>NCT02970305<br>NCT04531982<br>NCT03121586<br>NCT03994965 |
| Tourette syndrome (TS)                                                                                              | In TS, 5-HT <sub>2A</sub> receptors regulate postsynaptically to increase sensitivity for the remaining 5-HT. 5-HT <sub>2A</sub> receptor antagonists up-regulated 5-HT <sub>2A</sub> receptor decreasing 5-HT, which can further enhance dopamine regulation. Thus, the relationship between serotonin and dopamine receptors is probably associated with TS. | Wong DF, Brasić JR, Singer HS, Schretlen DJ, Kuwabara H, Zhou Y, et al. Mechanisms of dopaminergic and serotonergic neurotransmission in Tourette syndrome: clues from an in vivo neurochemistry study with PET. <i>Neuropsychopharmacology</i> 2008;33:1239-51.                                                     | NCT04794413                                                                            |

## Supplementary Material S5 - Scales

| Table – Scales performed on pimavanserin studies of Parkinson's disease psychosis      |              |                 |                                                  |                                                                                                             |                                                                                                                                                                                                                                     |
|----------------------------------------------------------------------------------------|--------------|-----------------|--------------------------------------------------|-------------------------------------------------------------------------------------------------------------|-------------------------------------------------------------------------------------------------------------------------------------------------------------------------------------------------------------------------------------|
| Scale                                                                                  | Acronym      | Number of items | Purpose                                          | Considerations                                                                                              | Reference                                                                                                                                                                                                                           |
| Clinical Global Impression-Severity                                                    | CGI-S        | 6               | Assessment of symptoms severity                  | Global assessment                                                                                           | Martínez-Martín P, Rojo-Abuin JM, Rodríguez-Violante M, Serrano-Dueñas M, Garretto N, Martínez-Castrillo JC, et al. Analysis of four scales for global severity evaluation in Parkinson's disease. NPJ Parkinsons Dis 2016;2:16007. |
| Clinical Global Impression-Improvement                                                 | CGI-I        | 6               | Assessment of symptoms improvement               | Global assessment                                                                                           | Bergman J, Lerner PP, Sokolik S, Lerner V, Kreinin A, Miodownik C. Successful use of escitalopram for the treatment of visual hallucinations in patients with Parkinson disease. Clinical Neuropharmacology 2017;40:246-50.         |
| Epworth Sleepiness Scale                                                               | ESS          | 8               | Daytime sleepiness                               | Unsuitable for screening for episodes of sudden sleep onset in patients with PD.                            | Kumar S, Bhatia M, Behari M. Excessive daytime sleepiness in Parkinson's disease as assessed by Epworth Sleepiness Scale (ESS). Sleep Med 2003;4:339-42.                                                                            |
| Mini-Mental Status Examination                                                         | MMSE         | 11              | Cognitive assessment                             | Easy and clear, most widely used screening tool for detecting dementia                                      | Aarsland D, Muniz G, Matthews F. Nonlinear decline of mini-mental state examination in Parkinson's disease. Mov Disord 2011;26:334-7.                                                                                               |
| Neuropsychiatric Inventory                                                             | NPI          | 12              | Cut-off psychosis                                | Efficient administration, separating symptom's frequency, some questions about specific psychotic phenomena | Pitton Rissardo J, Fornari Caprara AL. Parkinson's disease rating scales: a literature review. Ann Mov Disord 2020;3:3-22                                                                                                           |
| Parkinson's Psychosis Rating Scale                                                     | PPRS         | 7               | Psychosis assessment                             | Short, specifically to assess psychosis in PD. Fails to capture heterogeneous psychosis in PD.              | Friedberg G, Zoldan J, Weizman A, Melamed E. Parkinson Psychosis Rating Scale: a practical instrument for grading psychosis in Parkinson's disease. Clin Neuropharmacol 1998;21:280-4.                                              |
| Scale for the Assessment of Positive Symptoms - hallucinations and delusions subscales | SAPS-H+D     | 7 + 13          | Psychosis assessment                             | Broad spectrum, including hallucinations and delusions. The scale was developed for schizophrenia.          | Voss T, Bahr D, Cummings J, Mills R, Ravina B, Williams H. Performance of a shortened Scale for Assessment of Positive Symptoms for Parkinson's disease psychosis. Parkinsonism Relat Disord 2013;19:295-9.                         |
| Scale for the Assessment of Positive Symptoms – Parkinson's disease                    | SAPS-PD      | 9               | Psychosis assessment                             | Developed by the assessment of pimavanserin efficacy                                                        | Schubmehl S, Sussman J. Perspective on Pimavanserin and the SAPS-PD: Novel Scale Development as a Means to FDA Approval. Am J Geriatr Psychiatry 2018;26:1007-1011.                                                                 |
| Unified Parkinson's Disease Rating Scale Part II and Part III                          | UPDRS II/III | 10 + 21         | Activities in daily living and motor examination | Short, reliable, and valid, specifically for PD                                                             | Movement Disorder Society Task Force on Rating Scales for Parkinson's Disease. The Unified Parkinson's Disease Rating Scale (UPDRS): status and recommendations. Mov Disord 2003;18:738-50.                                         |
| Zarit Burden Interview, Caregiver burden scale                                         | CBS          | 22 items        | Caregiver burden                                 | Caregiver self-report measure                                                                               | Giguère-Rancourt A, Plourde M, Racine E, Couture M, Langlois M, Dupré N, et al. Altered Theory of Mind in Parkinson's Disease and Impact on Caregivers: A Pilot Study. Can J Neurol Sci 2022;49:437-440.                            |
